# Supplementary material
Source: publisher figshare collection journal article supplement (https://tandf.figshare.com/articles/dataset/_/6444614)
Supplement: Supplementary file 1 [file 1]

## Supplementary Material C: Substitution errors in handshape from deaf patients with schizophrenia

---

PEN LOCATED-AT-X-CL: /  / BOOK LOCATED-AT-X-ON-\*CL: /  /

[USE OF AIRPLANE-CLASSIFIER- /  / INSTEAD OF FLAT-OBJECT-CLASSIFIER- /  /]

---

BIRD BRANCH-CL: /  / \*SIT-ON-CL: /  /

[USE OF ISL VEHICLE-CLASSIFIER- /  / INSTEAD OF BSL ANIMAL-CLASSIFIER- /  /]

---

SHELVE LOCATED-AT-X-CL: /  / BOOKS LOCATED-AT-X-ON-\*CL: /  /

[USE OF ANIMAL-CLASSIFIER- /  / INSTEAD OF FLAT-OBJECT-CLASSIFIER /  /]

---

TABLE LOCATED-AT-X-CL: /  / CANS FOUR ON-THE-TOP-OF EACH-OTHER-\*CL: /  /

[USE OF ISL VEHICLE-CLASSIFIER- /  / INSTEAD OF CYLINDRICAL-OBJECT-CLASSIFIER /  /]

---

FEET TWO FLOOR-ON-CL: /  / RIGHT-FOOT-TAPPING-\*CL: /  /

[USE OF HAND CONFIGURATION CL: /  / INSTEAD OF FLAT-OBJECT-CLASSIFIER /  /]

---

TABLE LOCATED-AT-X-CL: /  / PENCILS ELEVEN SIDE-BY-SIDE-IN-A-ROW-\*CL: /  /

[USE OF FLAT-OBJECT-CLASSIFIER /  / INSTEAD OF LONG-THIN-OBJECT-CLASSIFIER /  /]

---
