# Supplementary material
Source: publisher figshare collection journal article supplement (https://tandf.figshare.com/articles/dataset/_/6444614)
Supplement: Supplementary file 2 [file 1]

Archive with 3 entries (3 files):
- pcnp_a_1476227_sm1209.pdf
- pcnp_a_1476227_sm1204.pdf
- pcnp_a_1476227_sm1047.pdf
