# Supplementary material
Source: publisher figshare collection journal article supplement (https://tandf.figshare.com/articles/dataset/_/6444614)
Supplement: Supplementary file 2 [file 1 › pcnp_a_1476227_sm1204.pdf]

Supplementary material A: Summary of clinical features and education of the patients

| No   | Age | Race      | Sex | Diagnosis              | Duration of illness (yrs) | Predominant symptoms                                                                                                                                                                                                 | School attended                        |
|------|-----|-----------|-----|------------------------|---------------------------|----------------------------------------------------------------------------------------------------------------------------------------------------------------------------------------------------------------------|----------------------------------------|
| PT1  | 36  | Caucasian | M   | F.20                   | 3                         | Moderate to severe persecutory delusions and tactile hallucinations.                                                                                                                                                 | Deaf primary and secondary (both oral) |
| PT2  | 46  | Caucasian | M   | F.20                   | 20                        | Forensic patient, had attacked people due to severe persecutory delusions and hallucinations. Possible FTD recorded in casenotes or noted personally at least once.                                                  | Deaf primary and secondary (both oral) |
| PT3  | 40  | Caucasian | M   | F.20                   | 15                        | Long standing severe third person auditory hallucinations and commentary on his actions. Afraid people could hear the voice.                                                                                         | Deaf primary and secondary (both oral) |
| PT4  | 45  | Caucasian | M   | F.20                   | 6                         | Severe delusional pregnancy which began with a delusional perception, auditory hallucinations of foetus' voice. Possible FTD recorded in casenotes or noted personally at least once.                                | Deaf primary and secondary (both oral) |
| PT5  | 65  | Caucasian | F   | F.20                   | 42                        | Chronic mild delusions and moderate auditory hallucinations.                                                                                                                                                         | Deaf primary and secondary (both oral) |
| PT6  | 38  | Caucasian | M   | F.20                   | 15                        | Chronic mild hebephrenic picture, past mild hallucinations and delusions. Possible FTD recorded in casenotes or noted personally at least once.                                                                      | Deaf primary and secondary (both oral) |
| PT7  | 44  | Caucasian | M   | F.20                   | 25                        | Moderate to severe, vivid persecutory delusions and hallucinations                                                                                                                                                   | Deaf primary and secondary (both oral) |
| PT8  | 41  | Caucasian | F   | F.20                   | 20                        | Moderate to severe long standing delusions/hallucinations including tactile (e.g. people injecting her with drugs). Possible FTD recorded in casenotes or noted personally at least once.                            | Deaf primary and secondary (both oral) |
| PT9  | 57  | Caucasian | F   | F.20                   | 35                        | Chronic illness with mainly residual symptoms.                                                                                                                                                                       | Deaf primary and secondary (both oral) |
| PT10 | 46  | Caucasian | F   | F.20                   | 2                         | Moderate to severe persecutory delusions and some delusional memories, also suspected hallucinations                                                                                                                 | Deaf primary and secondary (both oral) |
| PT11 | 33  | Caucasian | F   | F.20                   | 4                         | Severe delusions which relapsed postnatally and suspected hallucinations.                                                                                                                                            | Deaf primary and secondary (both oral) |
| PT12 | 35  | Caucasian | M   | F.20                   | 3                         | Severe delusions (including that people had stolen his face), severe and dangerous hallucinations. Possible FTD recorded in casenotes or noted personally at least once.                                             | Deaf primary and secondary (both oral) |
| PT13 | 29  | Caucasian | F   | F.20                   | 11                        | Ongoing moderate to severe delusions and mild hallucinations.                                                                                                                                                        | Deaf primary and secondary (both oral) |
| PT14 | 57  | Caucasian | M   | F.20 (schizoaffective) | 30                        | Moderate to severe chronic relapsing illness with some affective features . Fixed religious delusions with visual and auditory hallucinations. Possible FTD recorded in casenotes or noted personally at least once. | Deaf (Dublin)                          |
