# Supplementary material
Source: publisher figshare collection journal article supplement (https://tandf.figshare.com/articles/dataset/_/6444614)
Supplement: Supplementary file 2 [file 1 › pcnp_a_1476227_sm1209.pdf]

Supplementary material B: Type of education of health deaf volunteers.

| No                                                                                                                                                                      | School attended                                                                                                                                                                                                            |
|-------------------------------------------------------------------------------------------------------------------------------------------------------------------------|----------------------------------------------------------------------------------------------------------------------------------------------------------------------------------------------------------------------------|
| BC1                                                                                                                                                                     | Deaf primary and secondary (both oral)                                                                                                                                                                                     |
| C3                                                                                                                                                                      | Primary: hearing, Secondary: deaf oral                                                                                                                                                                                     |
| C23                                                                                                                                                                     | Deaf primary and secondary (both oral)                                                                                                                                                                                     |
| C24                                                                                                                                                                     | Primary: hearing, Secondary: deaf oral                                                                                                                                                                                     |
| C28                                                                                                                                                                     | Primary: hearing, Secondary: deaf oral                                                                                                                                                                                     |
| BC2, BC3, BC4,<br>BC5, C1, C2, C4,<br>C5, C6, C7, C8,<br>C9, C10, C11,<br>C12, C13, C14,<br>C15, C16, C17,<br>C18, C19, C20,<br>C21, C22, C25,<br>C26, C27, C29,<br>C30 | Deaf school for both primary and secondary education. However, no information was available on medium (i.e. oral or sign). It is believed that with the UK's Deaf education history, it is most likely that this was oral. |
